# Supplementary material
Source: PubMed Central journal article supplement (PMC6234487)
Supplement: bm8b01429_si_001.pdf [file bm8b01429_si_001.pdf]

## Supplementary Materials for

Clinical evidence for use of a non-invasive biosensor for tear glucose as an alternative to painful finger-prick for diabetes management utilizing biopolymer coating

Alicja E Kownacka<sup>†</sup>, Dovile Vegelyte<sup>†</sup>, Maurits Joosse<sup>‡</sup>, Nicoleta Anton<sup>§</sup>, B. Jelle Toebes<sup>†</sup>, Jan Lauko<sup>†</sup>, Irene Buzzacchera<sup>†</sup>, Katarzyna Lipinska<sup>†</sup>, Daniela A Wilson<sup>⊥</sup>, Nel Geelhoed-Duijvestijn<sup>‡\*</sup> Christopher Wilson<sup>†\*</sup>.

Correspondence to: [c.wilson@noviosense.com](mailto:c.wilson@noviosense.com) and [p.geelhoed@haaglandenmc.nl](mailto:p.geelhoed@haaglandenmc.nl)

### **This PDF file includes:**

Figures. S1 to S2  
References (1-2)

## Supplementary Text

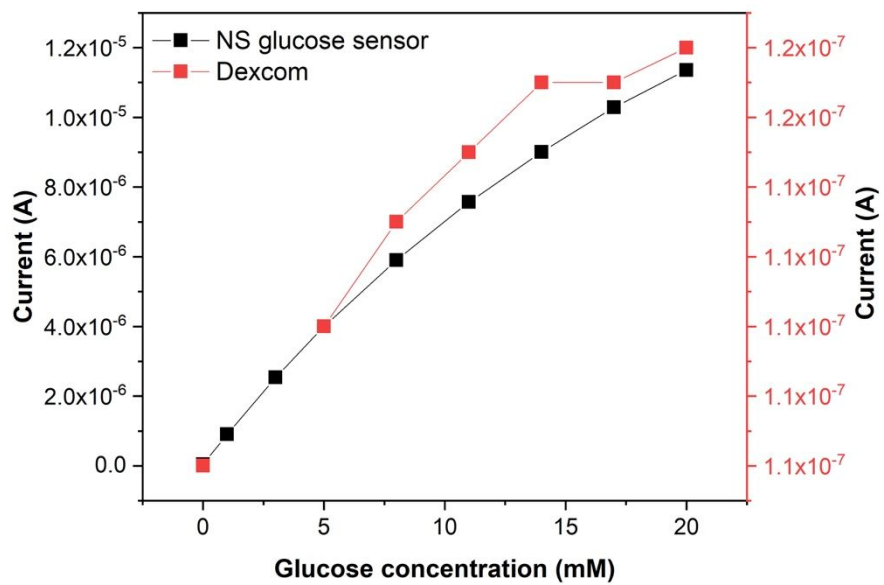

**Figure S1. Electrochemical performance of NovioSense minimal-invasive tear glucose sensor. Calibration curve obtained in PBS (x1) solution, NovioSense device vs Dexcom G4.**

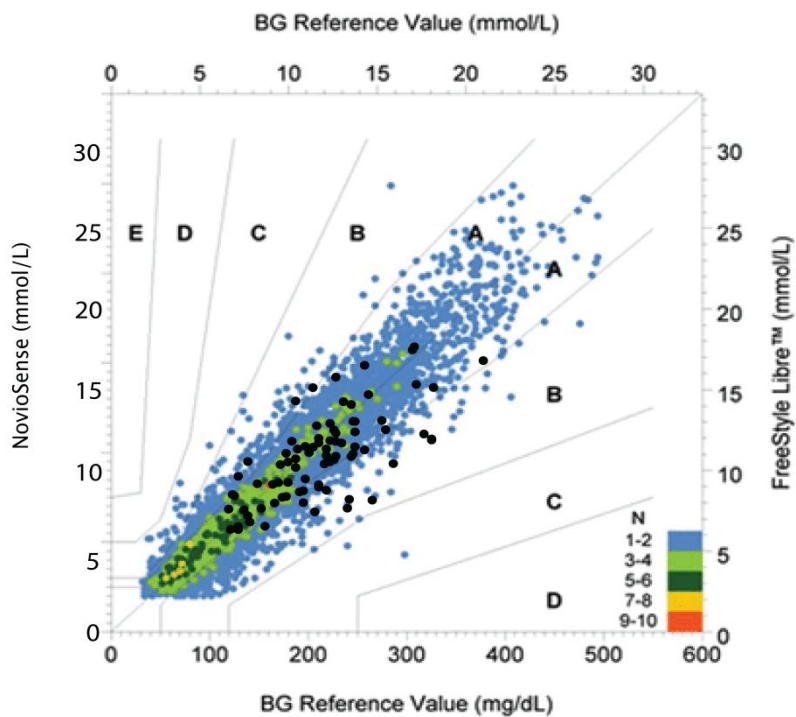

**Figure S2.** Clinical comparison of the data acquired from clinical subjects wearing NovioSense tear glucose sensor vs FreeStyle Libre, Abbott. NovioSense clinical data overlaid onto Abbott Clinical data(2), NovioSense data is displayed as black dots.

## References:

1. H. J. Hanssen.; Tweehuysen, R. Electrochemical Biosensor Based on Hollow Coils, Method for Making and Use of the Sensor and a Medical Device Comprising the Sensor. EP2699690B1, **2014**.
2. T. Bailey, B. W. Bode, M. P. Christiansen, L. J. Klaff, S. Alva, The Performance and Usability of a Factory-Calibrated Flash Glucose Monitoring System. *Diabetes Technol Ther.* **17**, 787–794 (2015).
